# Supplementary material for: Multifunctional aqueous polyurethanes with high strength and self-healing efficiency based on silver nanowires for flexible strain sensors
Source: Royal Society of Chemistry journal article supplement (doi:10.1039/d3cp04319c), 2023-12-13
Supplement: d3cp04319c1.pdf [file d3cp04319c1.pdf]

## Supporting Information

### **Multifunctional aqueous polyurethanes with high strength and self-healing efficiency based on silver nanowires for flexible strain sensors**

Haibin Niu,<sup>a</sup> Jiaqi Li,<sup>a</sup> Xin Song,<sup>a</sup> Kaiyang Zhao,<sup>a</sup> Li Liu,<sup>\*ab</sup> Chao Zhou,<sup>ab</sup> and Guangfeng Wu<sup>\*ab</sup>

<sup>a</sup> School of Chemical Engineering, Changchun University of Technology, Changchun, 130012, China.

<sup>b</sup> Engineering Research Center of Synthetic Resin and Special Fiber, Ministry of Education, Changchun University of Technology, Changchun 130012, China.

\*To whom correspondence should be addressed. E-mail: [gfwu@ccut.edu.cn](mailto:gfwu@ccut.edu.cn)

**TABLE S1 GLASS TRANSITION TEMPERATURE OF WPU-UXDY CURED FILM**

| SAMPLE   | Tg (°C) |
|----------|---------|
| WPU-U3D0 | 55.2    |
| WPU-U2D1 | 54.6    |
| WPU-U1D1 | 54.3    |
| WPU-U1D2 | 53.3    |
| WPU-U0D3 | 52.6    |
